# Supplementary material for: XIAP as a Target of New Small Organic Natural Molecules Inducing Human Cancer Cell Death
Source: PubMed Central journal article supplement (PMC6770071; doi:10.3390/cancers11091336), 2019-09-09
Supplement: cancers-11-01336-s001.pdf [file cancers-11-01336-s001.pdf]

Supplementary Materials

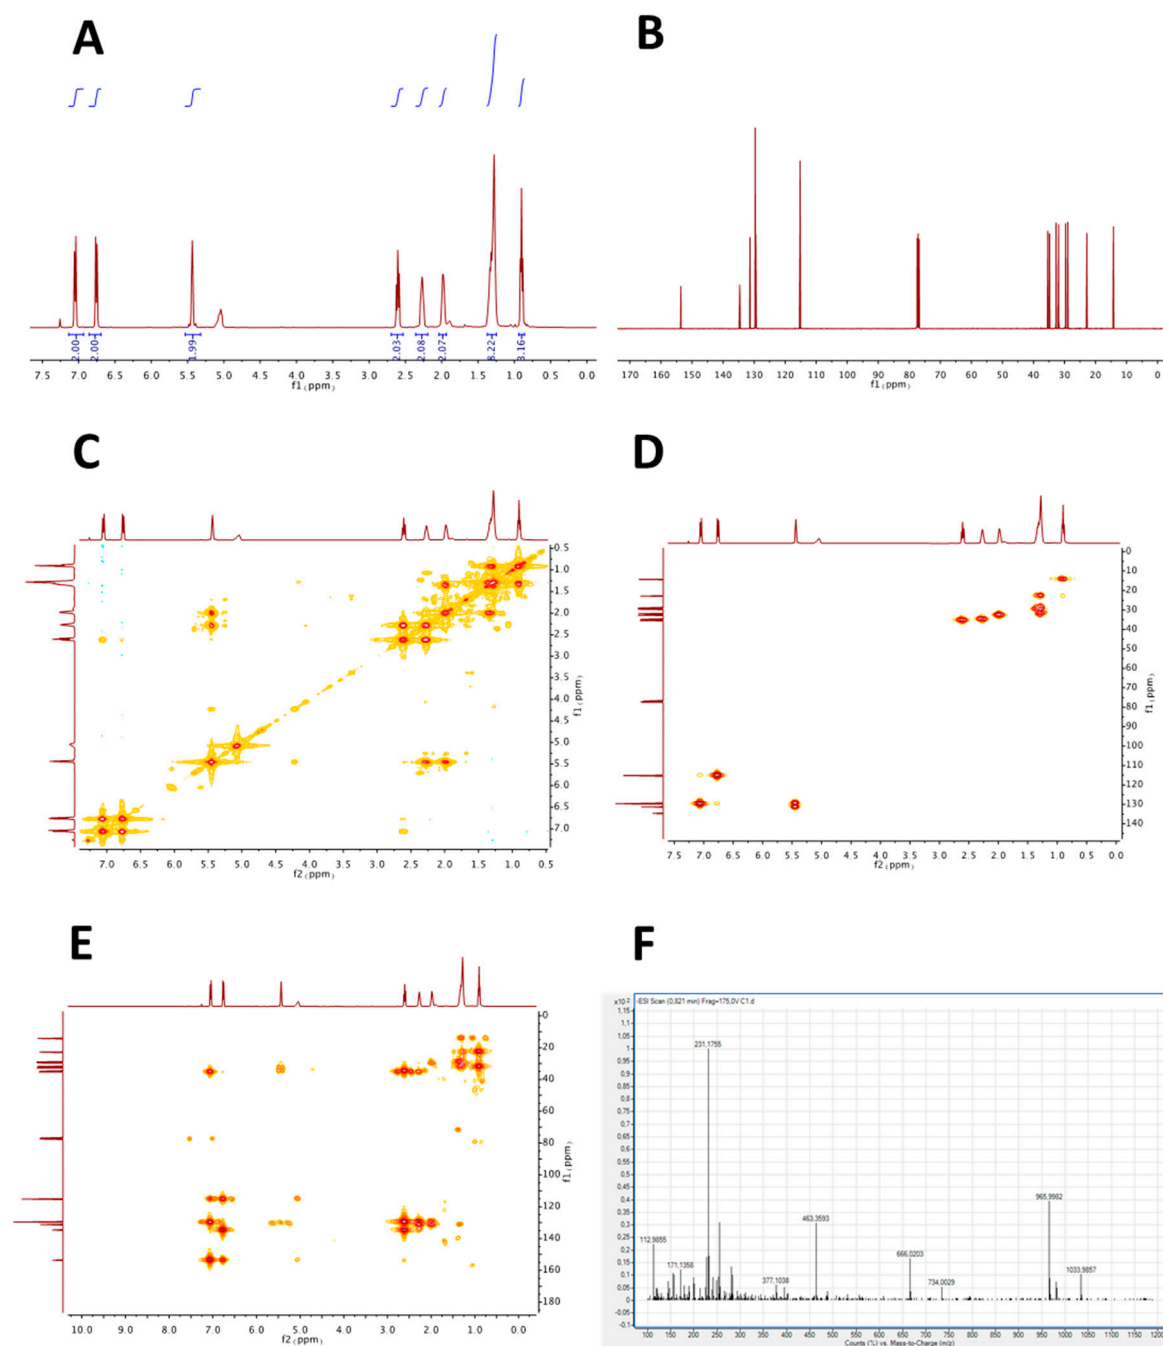

**Figure S1.** NMR spectroscopy (400 MHz,  $\text{CDCl}_3$ ) and HRESIMS of compound 1. (A)  $^1\text{H}$  NMR spectrum. (B)  $^{13}\text{C}$  NMR spectrum (75 MHz,  $\text{CDCl}_3$ ). (C)  $^1\text{H}$ - $^1\text{H}$  COSY spectrum. (D) HMQC spectrum. (E) HMBC spectrum. (F) HRESIMS spectrum.

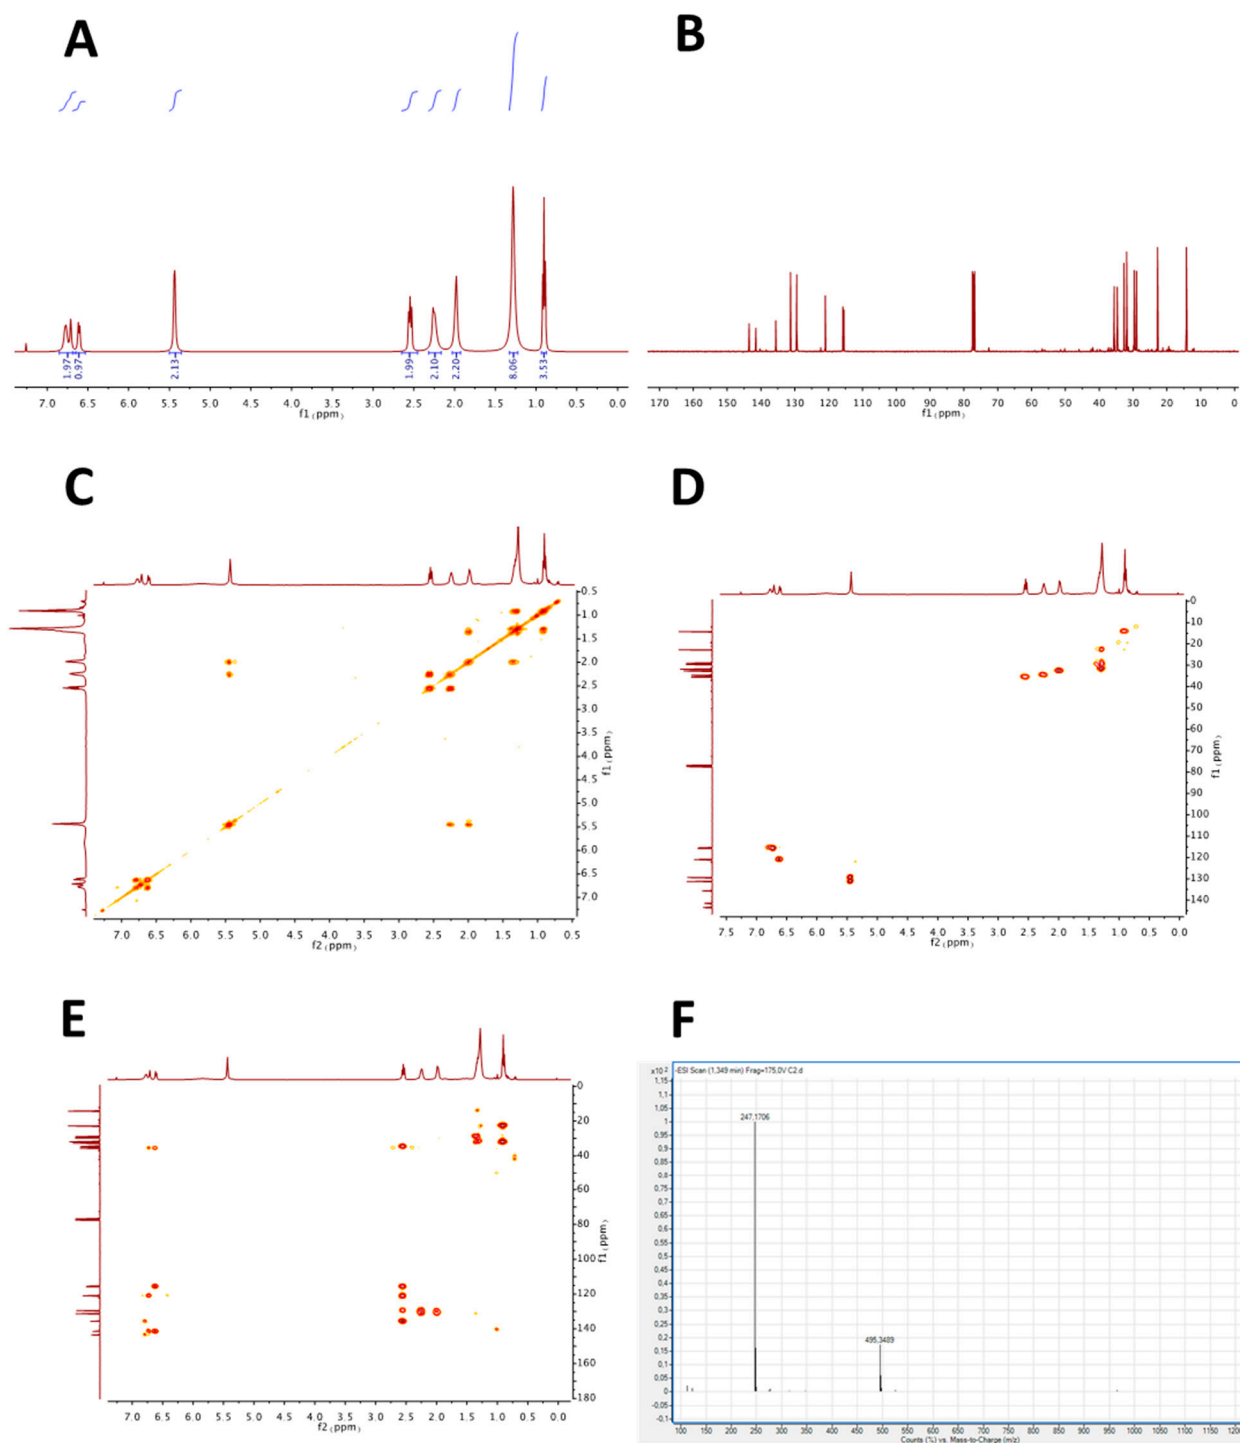

**Figure S2.** NMR spectroscopy (400 MHz,  $\text{CDCl}_3$ ) and HRESIMS of compound 2. (A)  $^1\text{H}$  NMR spectrum. (B)  $^{13}\text{C}$  NMR spectrum (75 MHz,  $\text{CDCl}_3$ ). (C)  $^1\text{H}$ - $^1\text{H}$  COSY spectrum. (D) HMQC spectrum. (E) HMBC spectrum. (F) HRESIMS spectrum.

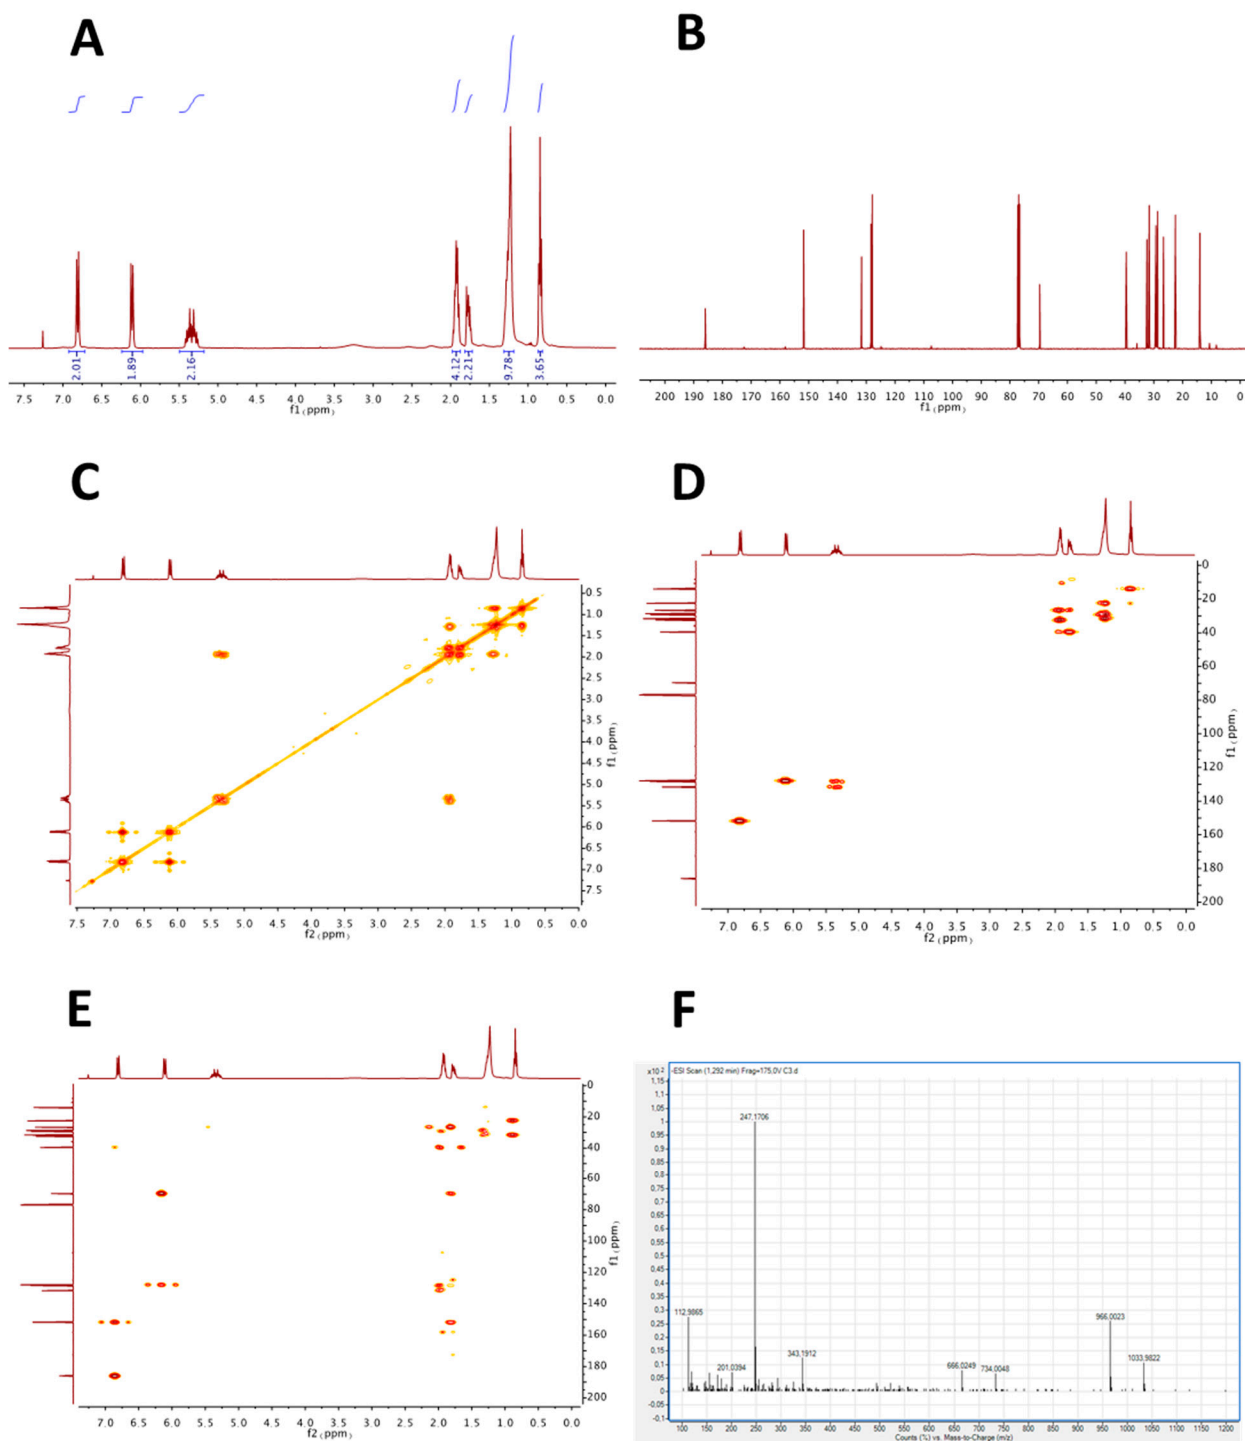

**Figure S3.** NMR spectroscopy (400 MHz,  $\text{CDCl}_3$ ) and HRESIMS of compound 3. (A)  $^1\text{H}$  NMR spectrum. (B)  $^{13}\text{C}$  NMR spectrum (75 MHz,  $\text{CDCl}_3$ ). (C)  $^1\text{H}$ - $^1\text{H}$  COSY spectrum. (D) HMQC spectrum. (E) HMBC spectrum. (F) HRESIMS spectrum.

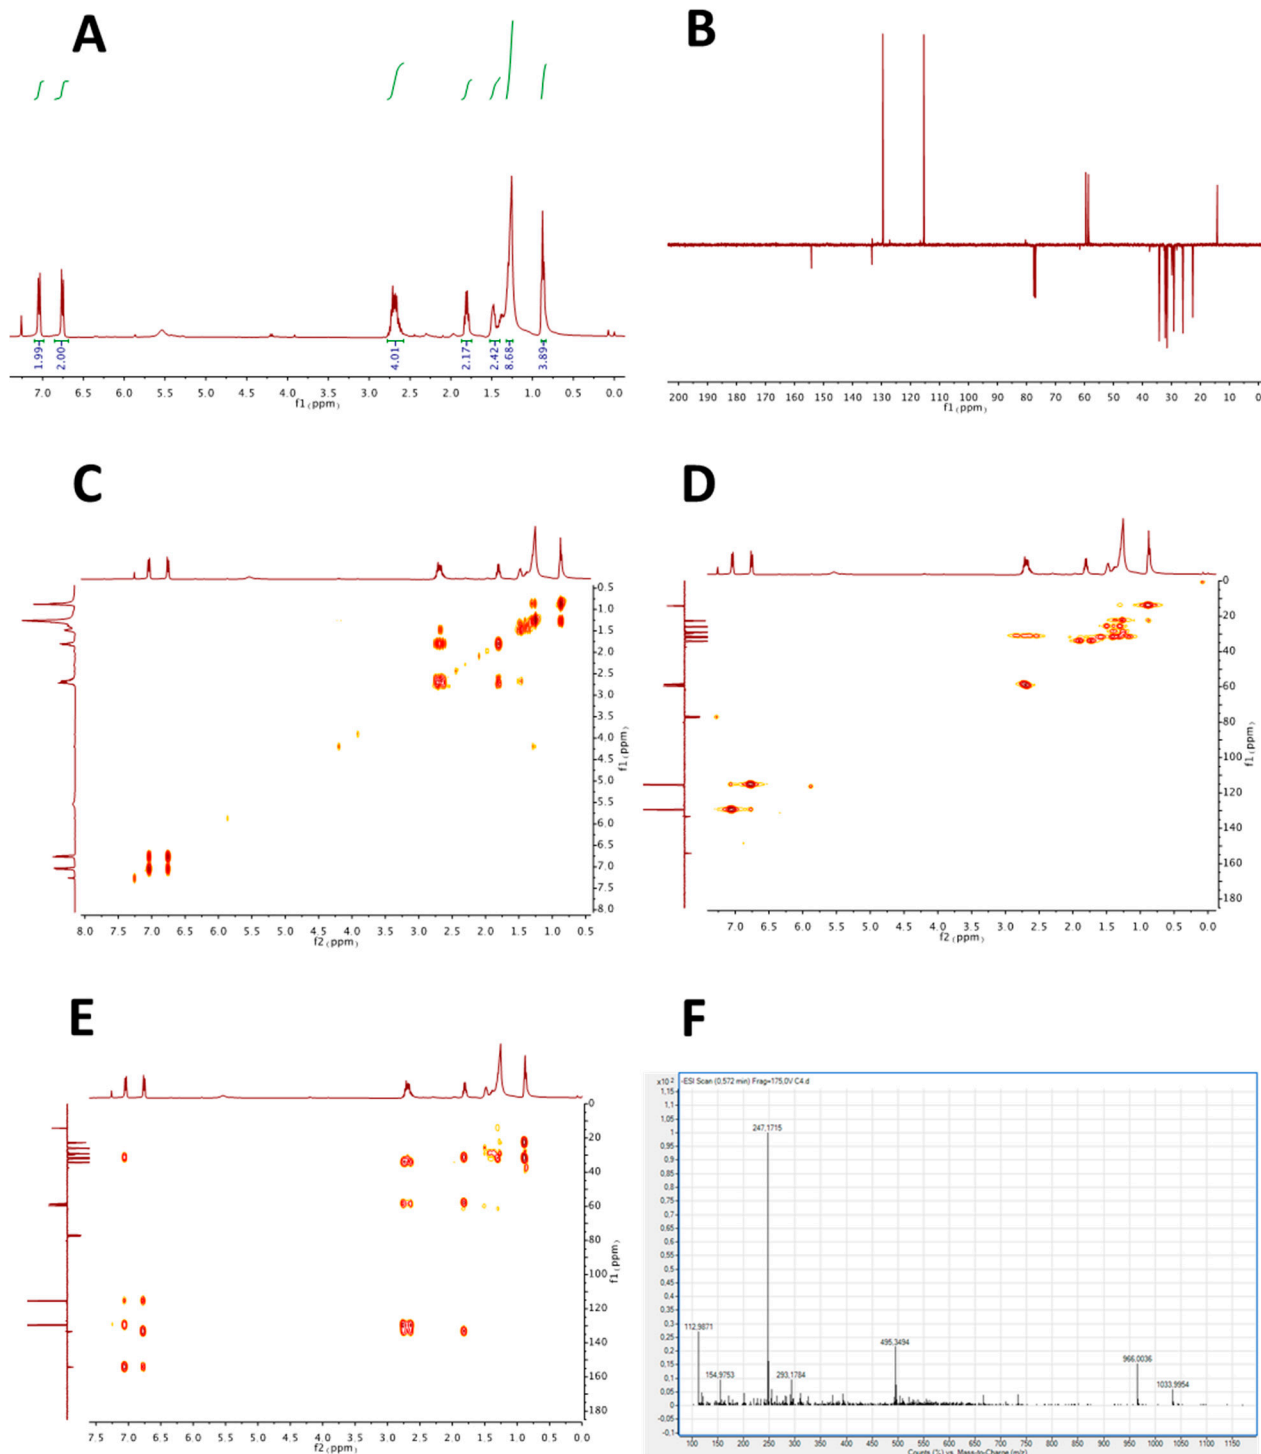

**Figure S4.** NMR spectroscopy (400 MHz,  $\text{CDCl}_3$ ) and HRESIMS of compound 4. (A)  $^1\text{H}$  NMR spectrum. (B)  $^{13}\text{C}$  NMR spectrum (75 MHz,  $\text{CDCl}_3$ ). (C)  $^1\text{H}$ - $^1\text{H}$  COSY spectrum. (D) HMQC spectrum. (E) HMBC spectrum. (F) HRESIMS spectrum.

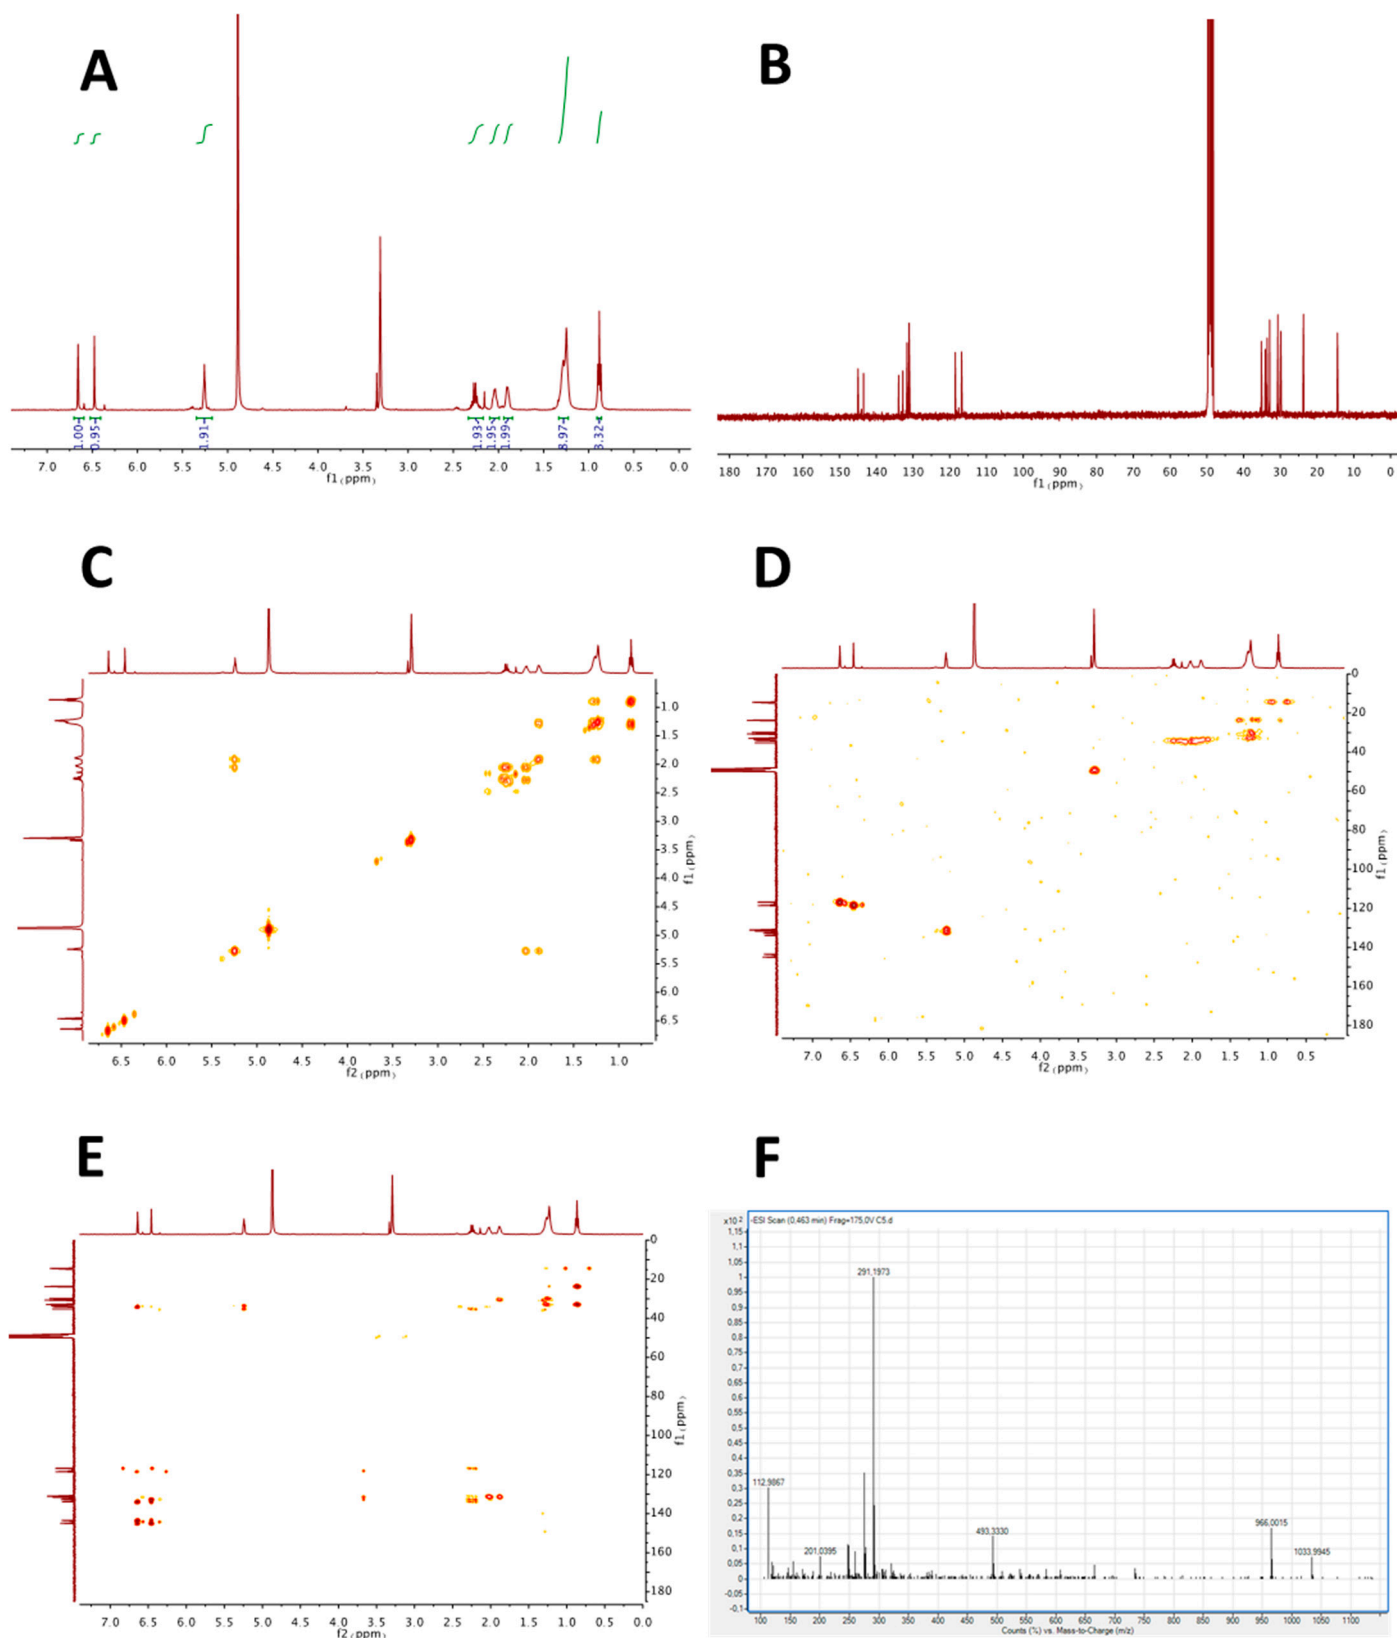

**Figure S5.** NMR spectroscopy (400 MHz,  $\text{CDCl}_3$ ) and HRESIMS of compound 5. (A)  $^1\text{H}$  NMR spectrum. (B)  $^{13}\text{C}$  NMR spectrum (75 MHz,  $\text{CDCl}_3$ ). (C)  $^1\text{H}$ - $^1\text{H}$  COSY spectrum. (D) HMQC spectrum. (E) HMBC spectrum. (F) HRESIMS spectrum.

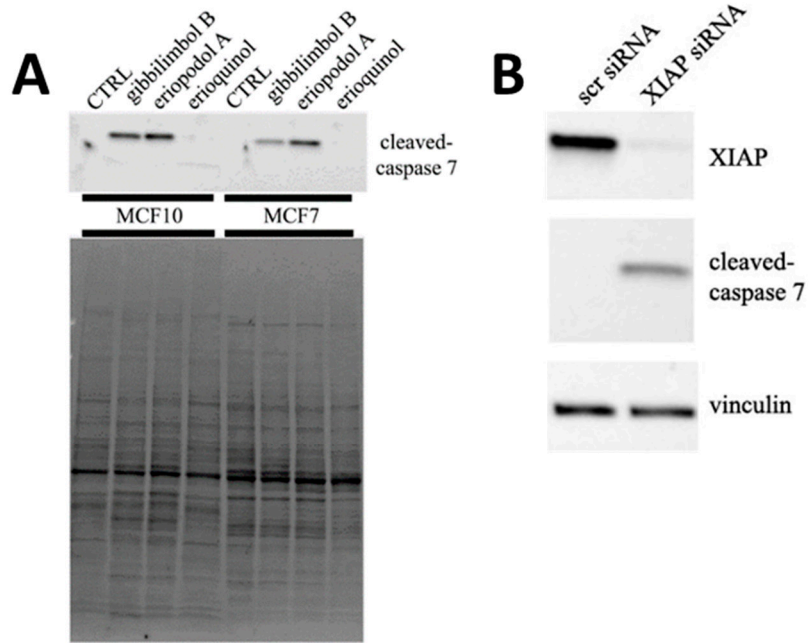

**Figure S6.** Western blot. **(A)** Western blot analysis of cleaved-caspase 7 in MCF10 and MCF7 cells treated for 6 h in the absence (CTRL, control) and in the presence of 30  $\mu\text{g}/\text{mL}$  gibbilibol B/eriopodol A or 10  $\mu\text{g}/\text{mL}$  erioquinol. The stain-free gel was used as loading control. Images are representative of three independent experiments. **(B)** Western blot analysis of X-linked inhibitor of apoptosis protein (XIAP) and cleaved-caspase 7 in MCF7 cells transfected for 24 h with a XIAP-specific and scrambled targeting (scr) siRNA (100 nM). Vinculin was used as internal standard. Images are representative of three independent experiments.

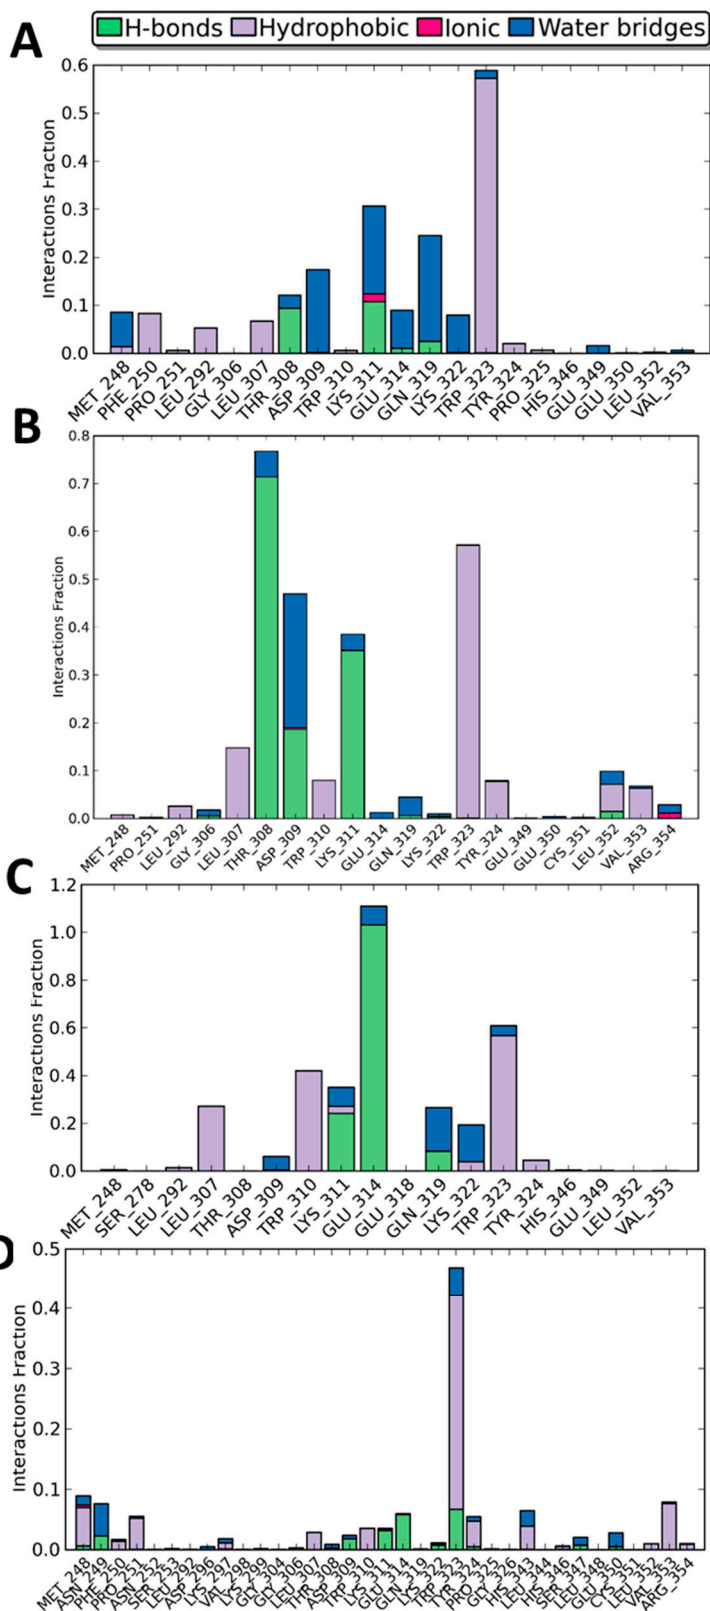

**Figure S7.** Protein-ligand interactions fraction for evaluated ligands and X-linked inhibitor of apoptosis protein (XIAP) baculovirus IAP repeat (BIR)-3 domain during the molecular dynamics trajectory of 50 ns. (A) embelin, (B) erioquinol, (C) eriopodol A and (D) gibbilibol B.

**Table S1.**  $^1\text{H}$  NMR (400 MHz) data for compounds 1–4 in  $\text{CDCl}_3$  and compound 5 in MeOD.

| Position | $\delta\text{H}$ (J in Hz) |                          |                           |                          |                          |
|----------|----------------------------|--------------------------|---------------------------|--------------------------|--------------------------|
|          | C-1                        | C-2                      | C-3                       | C-4                      | C-5                      |
| 1        | -                          | -                        | -                         | -                        | -                        |
| 2        | 6.75 (2H, d, $J = 8.48$ )  | -                        | 6.11 (2H, d, $J = 9.94$ ) | 6.76 (2H, d, $J = 8.3$ ) | -                        |
| 3        | 7.04 (2H, d, $J = 8.47$ )  | 6.71 (1H, s)             | 6.81 (2H, d, $J = 9.96$ ) | 7.04 (2H, d, $J = 8.3$ ) | 6.51 (1H, s)             |
| 4        | -                          | -                        | -                         | -                        | -                        |
| 5        | 7.04 (2H, d, $J = 8.47$ )  | 6.60 (1H, d, $J = 7.5$ ) | 6.81 (2H, d, $J = 9.96$ ) | 7.04 (2H, d, $J = 8.3$ ) | -                        |
| 6        | 6.75 (2H, d, $J = 8.48$ )  | 6.77 (1H, d, $J = 7.6$ ) | 6.11 (2H, d, $J = 9.94$ ) | 6.76 (2H, d, $J = 8.3$ ) | 6.69 (1H, s)             |
| 1'       | 2.60 (2H, t, $J = 7.3$ )   | 2.54 (2H, t, $J = 7.3$ ) | 1.77 (2H, m)              | 2.69 (2H, m)             | 2.26 (2H, m)             |
| 2'       | 2.26 (2H, m)               | 2.24 (2H, m)             | 1.93 (2H, m)              | 1.81 (2H, m)             | 2.04 (2H, m)             |
| 3'       | 5.42 (2H, brs)             | 5.42 (2H, brs)           | 5.34 (2H, m)              | 2.69 (1H, m)             | 5.26 (1H, brs)           |
| 4'       | 5.42 (2H, brs)             | 5.42 (2H, brs)           | 5.34 (2H, m)              | 2.69 (1H, m)             | 5.26 (1H, brs)           |
| 5'       | 1.97 (2H, m)               | 1.98 (2H, m)             | 1.93 (2H, m)              | 1.48 (2H, m)             | 1.91 (2H, m)             |
| 6'       | 1.26 (2H, m)               | 1.27 (2H, m)             | 1.23 (2H, m)              | 1.27 (2H, m)             | 1.29 (2H, m)             |
| 7'       | 1.26 (2H, m)               | 1.27 (2H, m)             | 1.23 (2H, m)              | 1.27 (2H, m)             | 1.29 (2H, m)             |
| 8'       | 1.26 (2H, m)               | 1.27 (2H, m)             | 1.23 (2H, m)              | 1.27 (2H, m)             | 1.29 (2H, m)             |
| 9'       | 1.26 (2H, m)               | 1.27 (2H, m)             | 1.23 (2H, m)              | 1.27 (2H, m)             | 1.29 (2H, m)             |
| 10'      | 0.89 (3H, t, $J = 6.8$ )   | 0.89 (3H, t, $J = 6.7$ ) | 0.85 (3H, t, $J = 6.75$ ) | 0.88 (3H, t, $J = 6.5$ ) | 1.29 (2H, m)             |
| 11'      | -                          | -                        | -                         | -                        | 1.29 (2H, m)             |
| 12'      | -                          | -                        | -                         | -                        | 0.89 (3H, t, $J = 6.8$ ) |

**Table S2.**  $^{13}\text{C}$  NMR (100 MHz) data for compounds 1–4 in  $\text{CDCl}_3$  and compound 5 in MeOD.

| Position | $\delta\text{C}$ (ppm) |       |       |       |       |
|----------|------------------------|-------|-------|-------|-------|
|          | C-1                    | C-2   | C-3   | C-4   | C-5   |
| 1        | 153.4                  | 141.3 | 185.9 | 154.1 | 144.9 |
| 2        | 115.0                  | 143.4 | 128.3 | 115.4 | 143.3 |
| 3        | 129.5                  | 115.6 | 151.7 | 129.5 | 118.4 |
| 4        | 134.4                  | 135.5 | 69.6  | 133.3 | 132.7 |
| 5        | 129.5                  | 120.8 | 151.7 | 129.5 | 133.9 |
| 6        | 115.0                  | 115.3 | 128.3 | 115.4 | 116.8 |
| 1'       | 35.2                   | 35.4  | 39.5  | 31.5  | 34.1  |
| 2'       | 34.6                   | 34.6  | 32.4  | 34.2  | 35.1  |
| 3'       | 129.2                  | 129.3 | 127.9 | 59.6  | 131.0 |
| 4'       | 131.1                  | 131.1 | 131.6 | 58.6  | 131.6 |
| 5'       | 32.5                   | 32.6  | 26.6  | 32.1  | 33.5  |
| 6'       | 29.5                   | 29.5  | 29.3  | 29.2  | 29.8  |
| 7'       | 28.8                   | 28.8  | 28.7  | 26.0  | 30.6  |
| 8'       | 31.7                   | 31.7  | 31.6  | 31.8  | 30.6  |
| 9'       | 22.6                   | 22.6  | 22.5  | 22.6  | 32.8  |
| 10'      | 14.0                   | 14.1  | 14.0  | 14.1  | 32.8  |
| 11'      | -                      | -     | -     | -     | 23.6  |
| 12'      | -                      | -     | -     | -     | 14.4  |
